# Supplementary material
Source: Royal Society of Chemistry journal article supplement (doi:10.1039/d6nj01219a)
Supplement: d6nj01219a1.pdf [file d6nj01219a1.pdf]

# **From Pollutant to Non-Toxic Product: Ov-Rich S-scheme Heterojunction for Photocatalytic Antibiotic Degradation and Toxicity Assessment**

Gulgina Mamtmin<sup>a,\*</sup>, Zehua Yuan<sup>a</sup>, Munire Tuerhong<sup>#,a</sup>, Jinhua Liang<sup>b</sup>, Xirenayi Aisikaer<sup>c</sup>, Jubao Zhang<sup>d</sup>

Xinjiang Key Laboratory of Novel Functional Materials Chemistry, College of Chemistry and Environmental Sciences, Kashi University, Kashi 844000, PR China

\*Corresponding authors. Email: [gulgina125@sina.com](mailto:gulgina125@sina.com)

### 3. Results and discussion

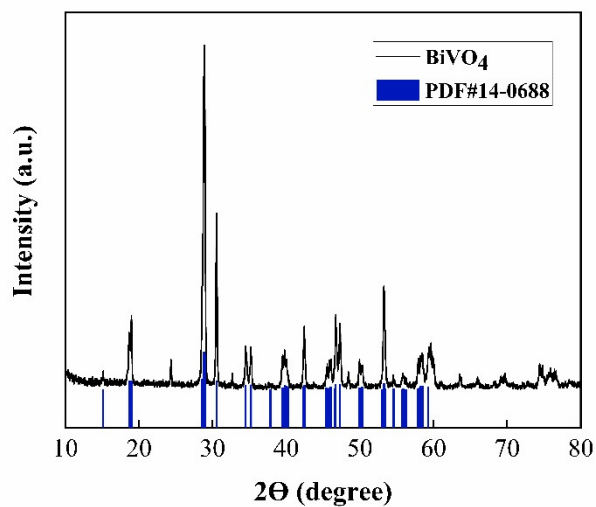

Fig. S1. The XRD pattern of BiVO<sub>4</sub>

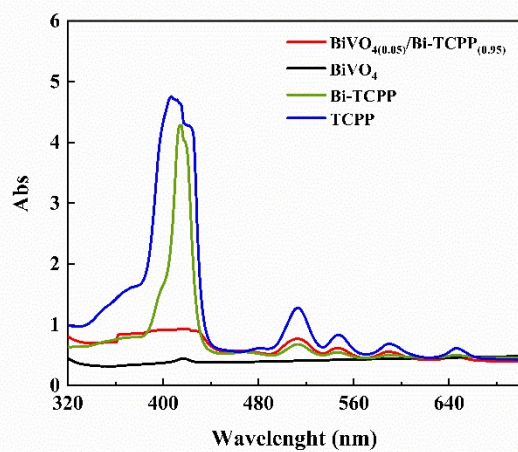

Fig. S2. UV-Vis spectra of TCPP, Bi-TCPP, BiVO<sub>4</sub> and 5%BiVO<sub>4</sub>/Bi-TCPP

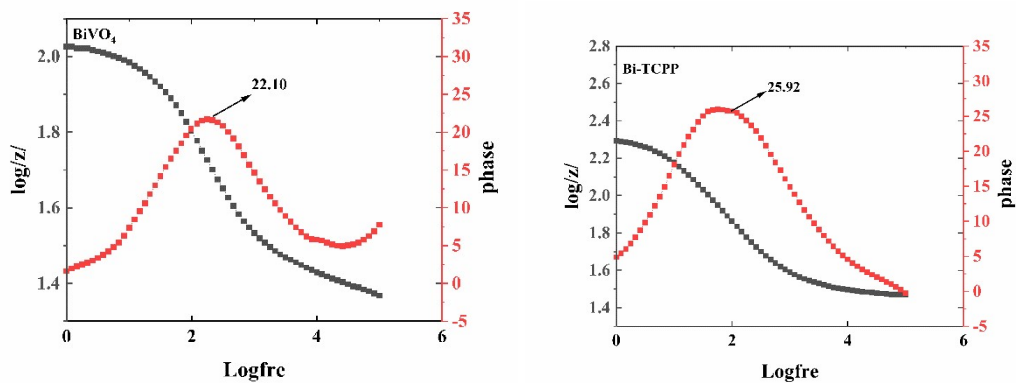

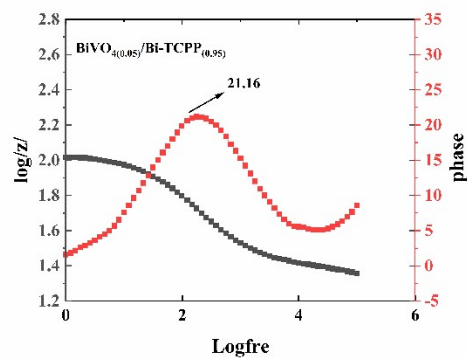

**Fig. S3.** EIS Bode plots of BiVO<sub>4</sub>, Bi-TCPP and 5%BiVO<sub>4</sub>/Bi-TCPP

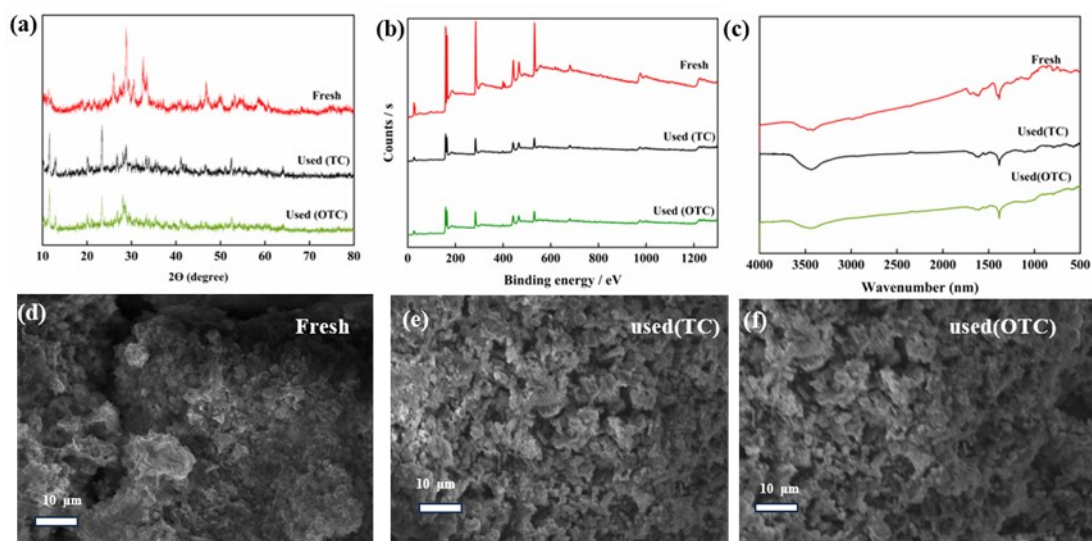

**Fig. S4.** Characterization of the photocatalyst before and after use: (a) XRD patterns, (b) XPS survey spectra, (c) FTIR spectra, and (d-f) SEM images of fresh and used catalysts.

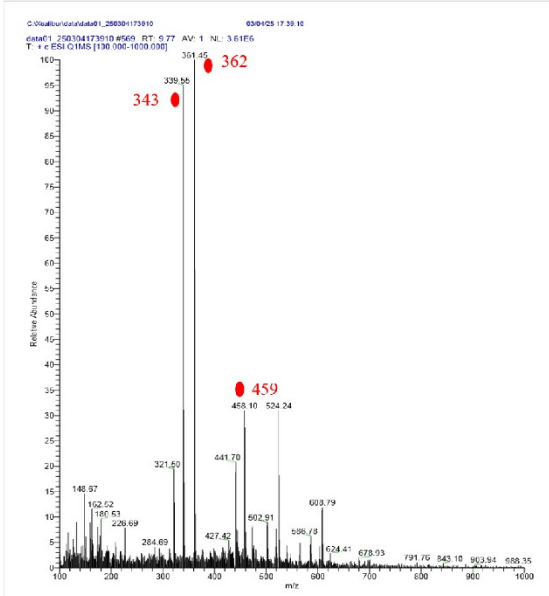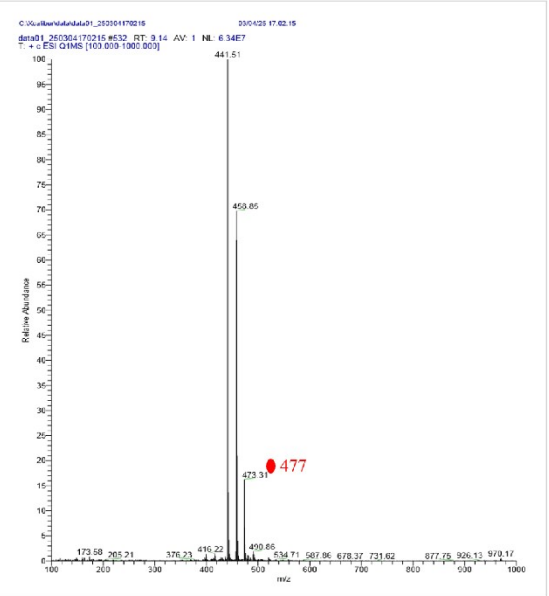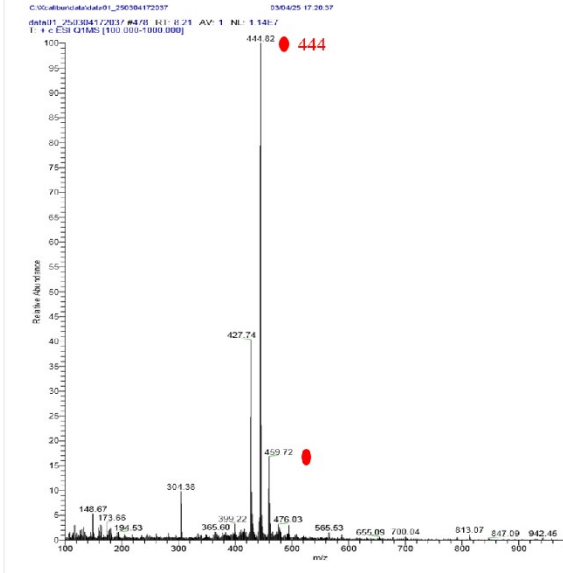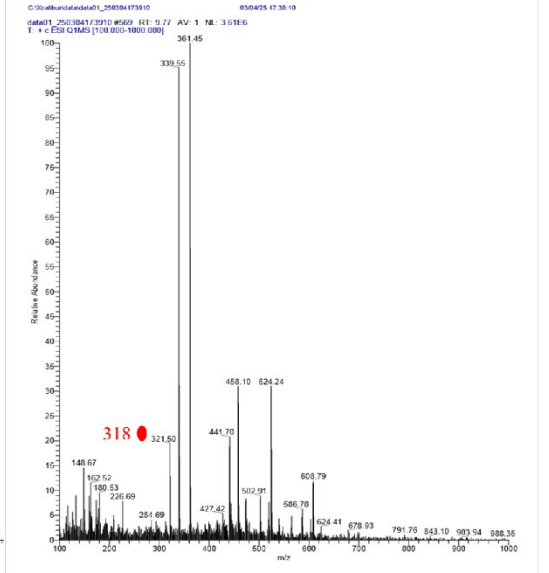

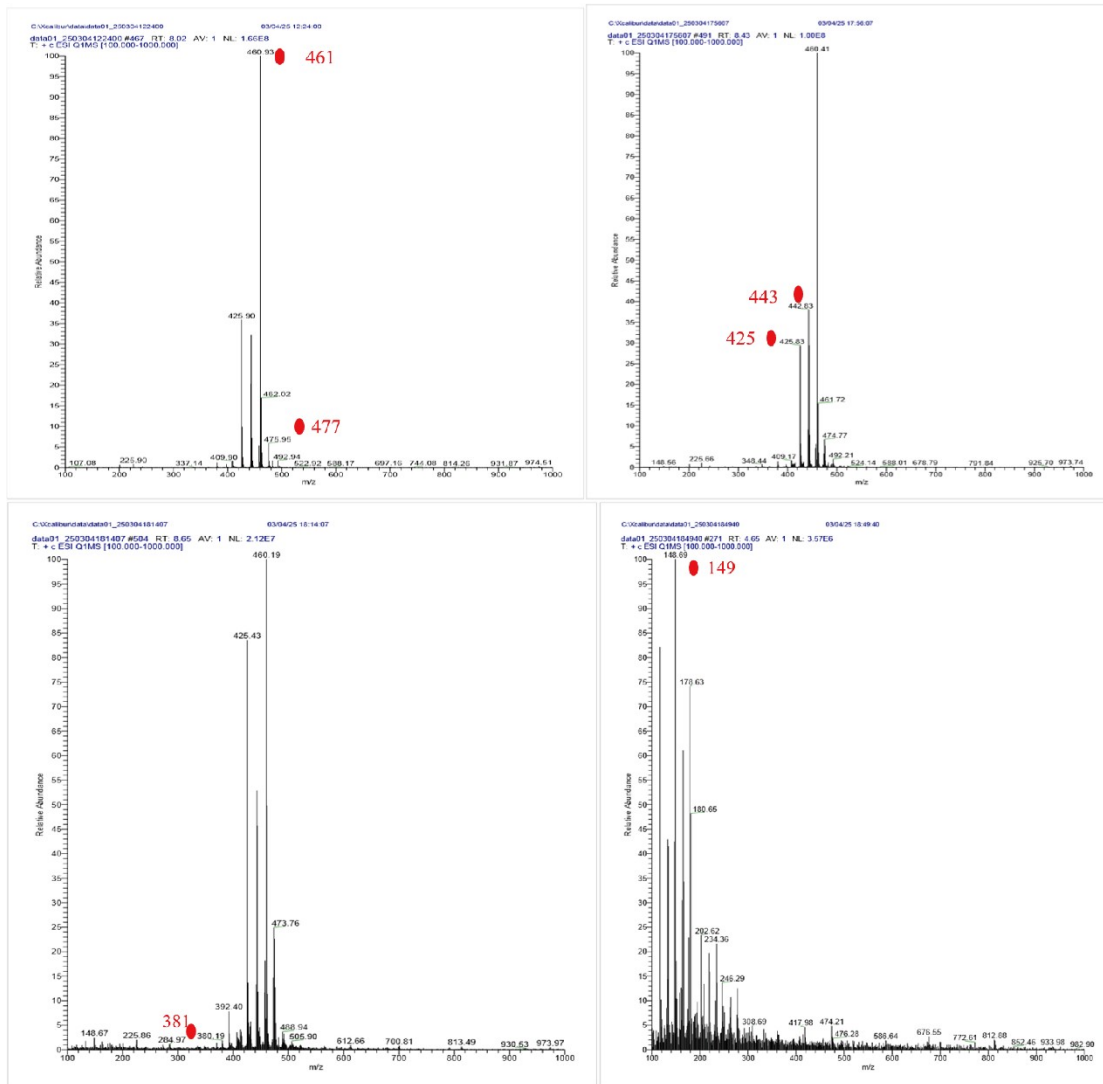

**Fig. S5.** MS/MS results of the reaction between TC and OTC with BiVO<sub>4</sub>/Bi-TCPP.

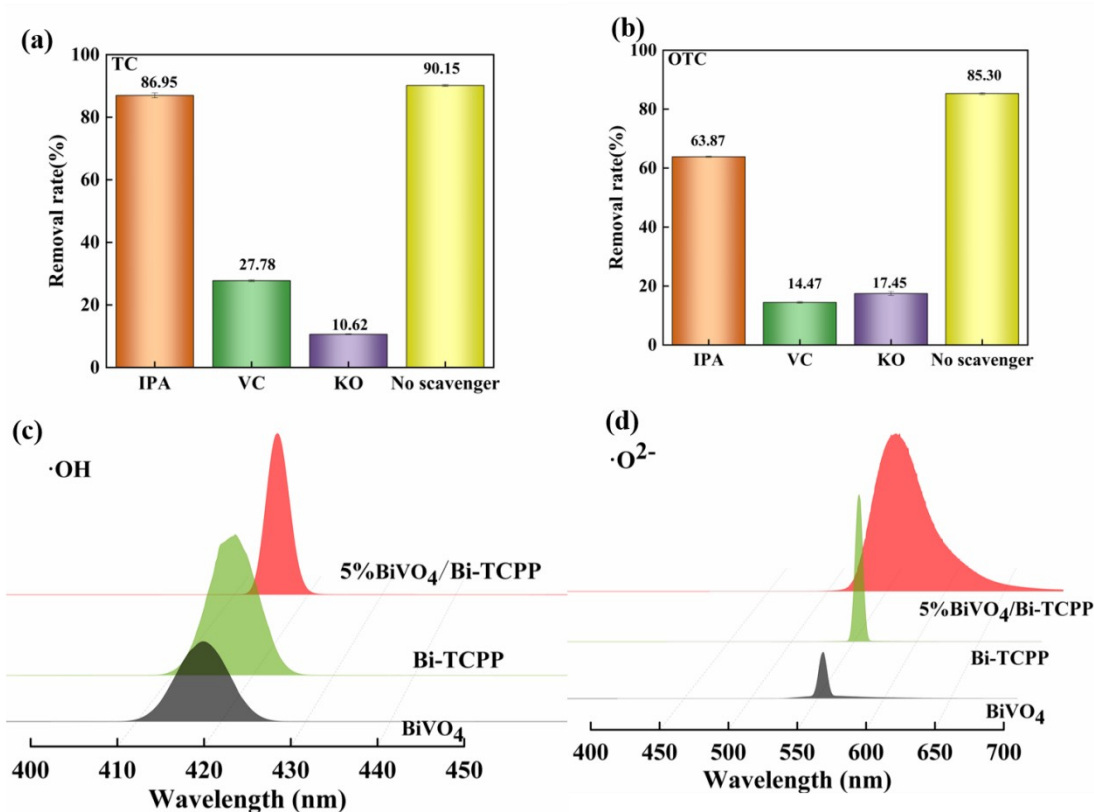

**Fig. S6.** Effects of diverse scavengers on the photo-oxidation of TC (a) and OTC (b). Relationship curve between the absorbance and the concentration of 2-OH-TA (c) and FS (d) in different systems.

## Tables

**Table S1** The specific surface areas, average pore size and pore volume of samples.

| samples                        | BET<br>( $\text{m}^2/\text{g}$ ) | Average pore diameter<br>(nm) | Pore volume<br>( $\text{cm}^3/\text{g}$ ) |
|--------------------------------|----------------------------------|-------------------------------|-------------------------------------------|
| $\text{BiVO}_4$                | 2.58                             | 3.88                          | 0.0050                                    |
| $\text{Bi-TCPP}$               | 11.87                            | 18.33                         | 0.0389                                    |
| $\text{BiVO}_4/\text{Bi-TCPP}$ | 20.45                            | 3.81                          | 0.0544                                    |

**Table S2** Comparison of photocatalytic degradation performance of representative photocatalysts for tetracycline antibiotics.

| Photocatalyst                       | Target Pollutant | Removal Efficiency | Reaction Time | Ref       |
|-------------------------------------|------------------|--------------------|---------------|-----------|
| BiVO <sub>4</sub> /Bi-TCPP          | TC               | 90.15%             | 90 min        | This work |
| BiVO <sub>4</sub> /Bi-TCPP          | OTC              | 85.30%             | 120 min       | This work |
| Cu <sub>2</sub> O/BiVO <sub>4</sub> | TC               | 78.90%             | 24 min        | 1         |
| ZnO/BiVO <sub>4</sub>               | OTC              | 88%                | 240 min       | 2         |
| AgI/BiVO <sub>4</sub>               | TC               | 94.91%             | 60 min        | 3         |
| PCN-224 (Zr-TCPP MOF)               | TC               | 92%                | 180 min       | 4         |

1. L. R. Xing, Z. J. Zhang, Y. H. Zhang and L. Ji, *Catalysts*, 2026, **16**, 63.
2. K. Wannakan, K. Khansamrit, T. Senasu and S. Nanan, *ACS Omega*, 2023, **5**, 4835-4852.
3. F. Chen, Q. Yang, J. Sun, F. B. Yao, S. Wang, Y. L. Wang, X. L. Wang, X. M. Li, C. G. Niu, D. B. Wang and G. M. Zeng, *ACS Appl. Mater. Interfaces*, 2016, **8**, 32887-32900.
4. Y. Q. Zong, S. S. Ma, J. M. Gao, M. J. Xu, J. J. Xue and M. X. Wang, *ACS Omega*, 2021, **6**, 17228-17238.
